# Supplementary material
Source: PubMed Central journal article supplement (PMC4813587)
Supplement: 10.1074_M115.689414_jbc.M115.689414-1.pdf [file 10.1074_M115.689414_jbc.M115.689414-1.pdf]

# Supplemental Information

## **Nuclear speckle-related protein 70 Binds to Serine/arginine-rich splicing factor-1 and -2 via an Arginine/Serine-Like Region and Counteracts Their Alternative Splicing Activity**

Chang-Hyun Kim<sup>†</sup>, Young-Dae Kim<sup>§</sup>, Eun-Kyung Choi<sup>†</sup>, Hye-Ran Kim<sup>†</sup>, Bo-Ra Na<sup>†</sup>, Sin-Hyeog Im<sup>¶</sup>, and Chang-Duk Jun<sup>†1</sup>

From the <sup>†</sup>School of Life Sciences, Immune Synapse Research Center and Cell Dynamics Research Center, Gwangju Institute of Science and Technology (GIST), Gwangju 500-712, Korea, the <sup>§</sup>Stem cell research center, Korea Research Institute of Bioscience and Biotechnology, 125 Gwahak-ro, Yuseong-gu, Daejeon 3414, Korea, and the <sup>¶</sup>Academy of Immunology and Microbiology (AIM), Institute for Basic Science (IBS), and Division of Integrative Biosciences and Biotechnology (IBB), Pohang University of Science and Technology, Pohang 790-784, Korea

**Running title:** NSrp70 Impedes SRSF1 and SRSF2 Splicing Activity

<sup>1</sup>To whom correspondence should be addressed: Dr. Chang-Duk Jun, School of Life Sciences, Gwangju Institute of Science and Technology (GIST) 123 Cheomdangwagi-ro, Gwangju 500-712, Republic of Korea. Tel.: +82-62-715-2506; Fax: +82-62-715-2546; E-mail: cdjun@gist.ac.kr

**Keywords:** alternative splicing; CD44; dimerization; heterogeneous nuclear ribonucleoprotein (hnRNP); RNA binding protein; NSrp70; RS-like region; SR protein; coiled-coil domain; nuclear speckle.

**Supplemental Figure 1. The top-four predicted models of RS region analyzed by I-TASSER server.** Predicted results showed that NSrp70 contains only  $\alpha$ -helical secondary structures and no  $\beta$ -sheet structures. The model quality is reported as a Confidence-score (C-score). Display style, including amino acid color and background of each predicted models (PDB file) were modified and visualized using the Discovery Studio 4.0 Visualizer program. Note: red ribbons, RS1 region (RS1-1–4, amino acids 290–378); orange ribbons, RS2 (amino acids 379–438); yellow ribbons, RS3 (amino acids 439–471).

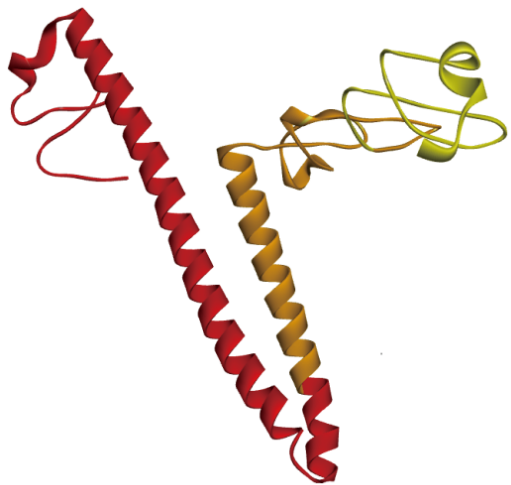

C-score = -1.59

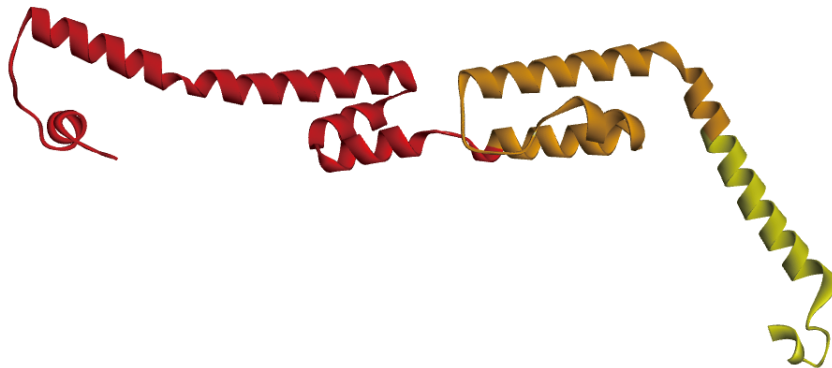

C-score = -3.77

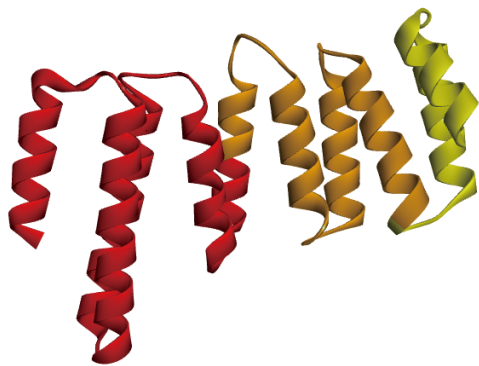

C-score = -2.22

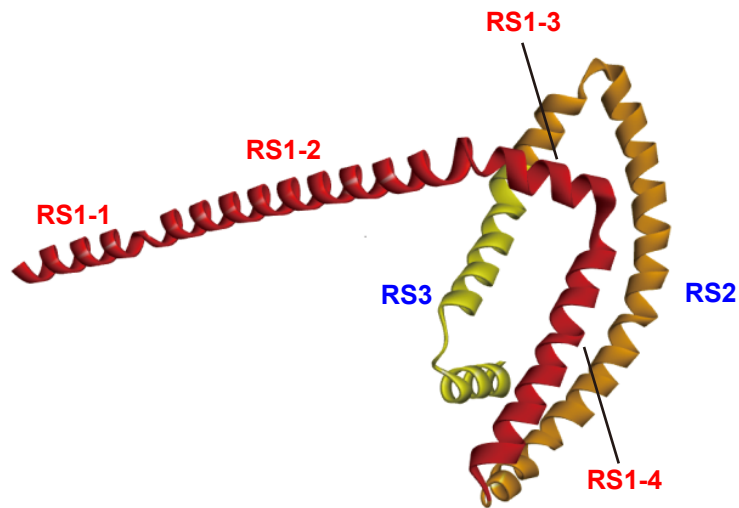

C-score = -3.88
